# Supplementary material
Source: Springer Nature journal article supplement (https://www.springermedizin.de/resource/supplementary/12885_2010_2544_MOESM4_ESM.pdf/9462532)

**A**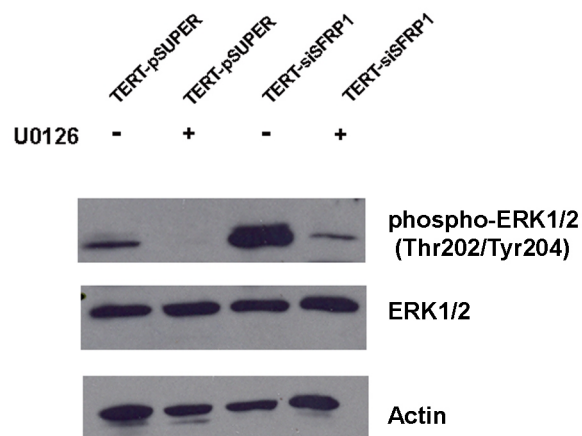**B**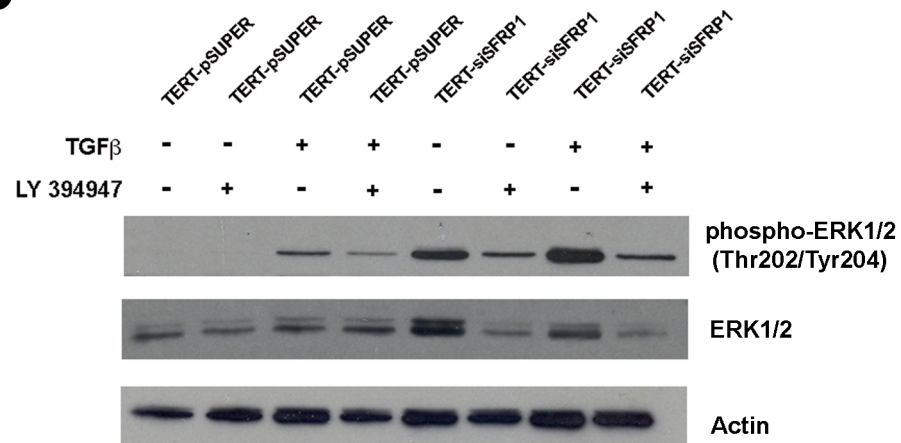**C**

TERT-pSUPER      TERT-siSFRP1

Vehicle

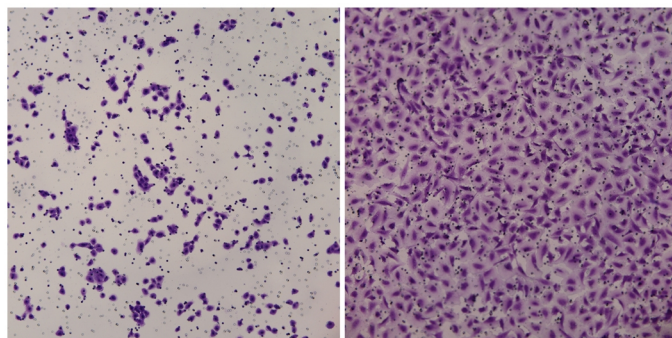

LY394947

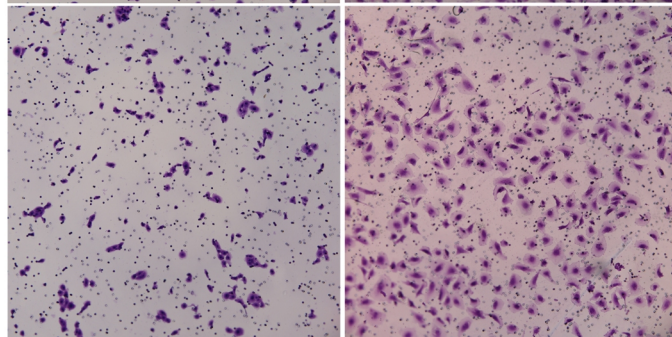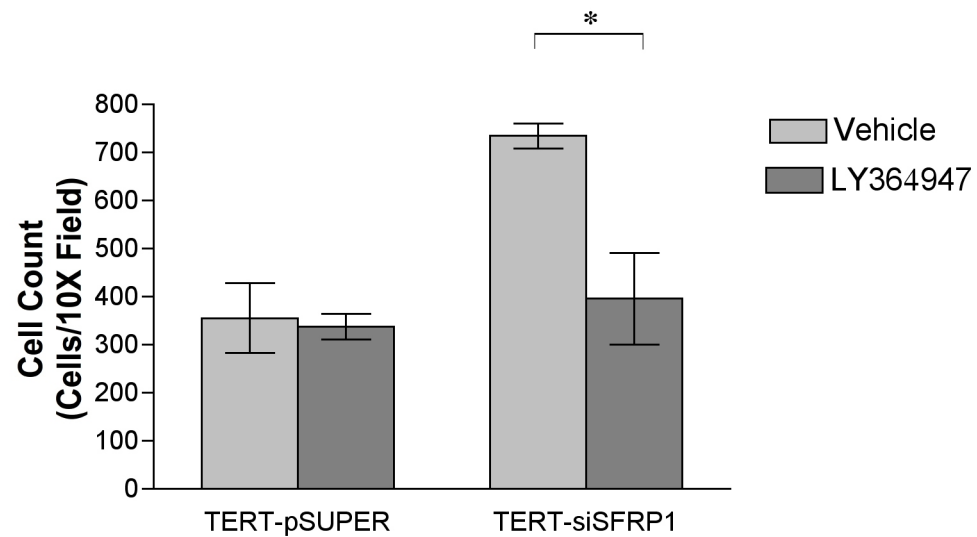

Supplement: MOESM4 [file 9462532]
